# Supplementary material for: The Impact of Experience, Length of Service, and Workplace Preparedness in Physicians’ Readiness in the Response to Disasters
Source: PubMed Central journal article supplement (PMC7603037; doi:10.3390/jcm9103328), 2020-10-16
Supplement: jcm-09-03328-s001.pdf [file jcm-09-03328-s001.pdf]

**4. Have you received any of the following trainings?**

|                    | YES                      | NO                       |
|--------------------|--------------------------|--------------------------|
| First Aid          | <input type="checkbox"/> | <input type="checkbox"/> |
| ALS                | <input type="checkbox"/> | <input type="checkbox"/> |
| BLS                | <input type="checkbox"/> | <input type="checkbox"/> |
| ACLS               | <input type="checkbox"/> | <input type="checkbox"/> |
| Triage             | <input type="checkbox"/> | <input type="checkbox"/> |
| Psychological care | <input type="checkbox"/> | <input type="checkbox"/> |
| Crisis management  | <input type="checkbox"/> | <input type="checkbox"/> |
| Humanitarian law   | <input type="checkbox"/> | <input type="checkbox"/> |
| HAZMAT/CBRN        | <input type="checkbox"/> | <input type="checkbox"/> |

**5. Which training would you like to participate?**

|                       |                          |
|-----------------------|--------------------------|
| a) First AID          | <input type="checkbox"/> |
| b) ALS                | <input type="checkbox"/> |
| c) BLS                | <input type="checkbox"/> |
| d) ACLS               | <input type="checkbox"/> |
| e) Triage             | <input type="checkbox"/> |
| f) Psychological care | <input type="checkbox"/> |
| g) Crisis management  | <input type="checkbox"/> |
| h) Humanitarian law   | <input type="checkbox"/> |
| i) HAZMAT/CBRN        | <input type="checkbox"/> |

**6. Does the workplace offer trainings / exercises related to preparation for disaster?**

- Yes
- No

7. How do you assess your own preparation for a disaster, on a scale of 1 to 5?

Very low 1 2 3 4 5 very well

8. How do you assess the current level of preparation of your workplace in case of a disaster, on a scale of 1 to 5?

Very low 1 2 3 4 5 very well

9. How do you assess the current level of preparation for the accident of the city of Lublin, on a scale of 1 to 5?

Very low 1 2 3 4 5 Very well

10. Gender:

- Men
- Women

11. Age:

- Up to 34
- 35-44
- 45-54
- 55 years and over

12. Workplace

- Public hospital
- Research facility
- Outpatient Clinic

13. Length of service:

- From 0 to 5 years
- 6-10
- 11-15
- 16-20
- More than 20 years

*Thank you for completing the survey*
